# Supplementary material for: Shining a light on fungicide- water: enhanced photocatalytic degradation using the CoTiO3/CaTiO3 nanocomposite and experimental and theoretical viewpoints on improved intervalence charge transfer from O2− to Ti4+ and from Co2+ to Ti4+ ions and spatial charge transfer
Source: Royal Society of Chemistry journal article supplement (doi:10.1039/d3nj05399g), 2024-01-01
Supplement: d3nj05399g1.pdf [file d3nj05399g1.pdf]

## Electronic Supplementary Information

### **Shining a light on fungicide-water: Enhanced photocatalytic degradation with CoTiO<sub>3</sub>/CaTiO<sub>3</sub> nanocomposite and its experimental and theoretical viewpoint of improved intervalence charge transfer of O<sup>2-</sup> to Ti<sup>4+</sup> and Co<sup>2+</sup> to Ti<sup>4+</sup> ion pairs and spatial charge transfer**

Moorthy Gnanasekar Narendran,<sup>a</sup> Elayaperumal Vijayakumar,<sup>a</sup> Muniyandi Govinda Raj,<sup>a</sup> Rajaraman Preetha<sup>a</sup> Joseph John Alphin,<sup>a</sup> Ramalingam Mahaan,<sup>a</sup> Bernaurdshaw Neppolian,<sup>b</sup> and Aruljothy John Bosco.\*<sup>a</sup>

<sup>a</sup>Advanced Materials Chemistry Laboratory, Department of Chemistry, Faculty of Engineering and Technology, SRM Institute of Science and Technology, Kattankulathur – 603 203, Chengalpattu, Tamil Nadu, India.

<sup>b</sup> Energy and Environmental Remediation Lab, Department of Chemistry, Faculty of Engineering and Technology, SRM Institute of Science and Technology, Kattankulathur – 603 203, Chengalpattu, Tamil Nadu, India.

\* Corresponding author information: Aruljothy John Bosco: E-mail: [johnbosa@srmist.edu.in](mailto:johnbosa@srmist.edu.in), [sambosco@gmail.com](mailto:sambosco@gmail.com). Tel: +91-98407 57430.

#### **1. Photocatalyst characterization**

The crystalline structure of the generated samples was determined using X-ray diffraction (XRD) patterns on an X'pert<sup>3</sup> powder XRD instrument (Malvern Panalytical, UK) equipped with a Cu K radiation ( $\lambda = 1.5406$ ) source. HR-TEM (JEOL, JEM-2100f) and HR-SEM (Thermo Scientific Apreo) were utilized to evaluate the microstructure and morphology of structural applications. X-ray photoelectron spectroscopy (PHI VersaProbe 4 (XPS))

Microprobe with Al K $\alpha$  radiation source) was used to identify sample surface characteristics. The carbon tape was utilized as a standard to calibrate the binding energy of XPS results. The UV-vis spectra were collected using a Shimadzu UV 3600i Plus at room temperature. Raman spectra were collected using a HORIBA scientific spectrometer with a 532 nm laser (LabRAM HR Evolution, Horiba.). The surface textural characterization was determined by the BET and BJH method of the N<sub>2</sub> adsorption-desorption isotherms using a Quantachrome Autosorb IQ. PL measurements were collected in the FLS1000 (Edinburgh Instruments) spectrometer. In the photocatalytic test, a 300 W Xenon lamp light source was used. An electrochemical workstation, Shanghai Chenhua CHI-660D, was used to conduct EIS and Mott-Schottky analysis using a three-electrode system of glassy carbon, Ag/AgCl, and Platinum electrodes and 0.1 mol L<sup>-1</sup> Na<sub>2</sub>SO<sub>4</sub> (pH  $\approx$  6) electrolyte. The working electrodes were prepared by sonicating catalysts in a 1:1 combination of ethanol and distilled water with 5  $\mu$ L Nafion for 30 min. The resulting sludge was then air-dried after a slowing drop cast on a glassy carbon electrode.

**Table S1** Calculated Crystallite size and Lattice strain of bare CoTiO<sub>3</sub> and CCO 75:25 composite.

| Sample code        | 2-Theta (Degree) | Crystallite size (nm) | Lattice strain (%) |
|--------------------|------------------|-----------------------|--------------------|
| CoTiO <sub>3</sub> | 32.813           | 107.6                 | 0.114              |
| CCO 75:25          | 33.181           | 33.8                  | 0.359              |

## 2. Validation of actual weight ratio using ICP-OES and EDAX analysis

To validate the actual weight ratio of the prepared CCO composites, we conducted inductively coupled plasma-optical emission spectroscopy (ICP-OES) and high-resolution scanning electron microscopy energy-dispersive X-ray spectroscopy (HR-SEM EDAX)

analyses. For the ICP-OES analysis, the composite was initially digested in an HNO<sub>3</sub> solution and then diluted to a volume of 100 mL using deionized water. In the HR-SEM EDAX analysis, the composite was coated in aluminum foil using ethanol.

**Table S2** The content of Co and Ca in the CCO composite was determined in ICP-OES analysis.

| <b>Samples</b>   | <b>Co<br/>(mg/L)</b> | <b>Ca<br/>(mg/L)</b> |
|------------------|----------------------|----------------------|
| <b>CCO 75:25</b> | 25.75                | 8.64                 |
| <b>CCO 50:50</b> | 16.1                 | 18.41                |
| <b>CCO 25:75</b> | 8.59                 | 25.77                |

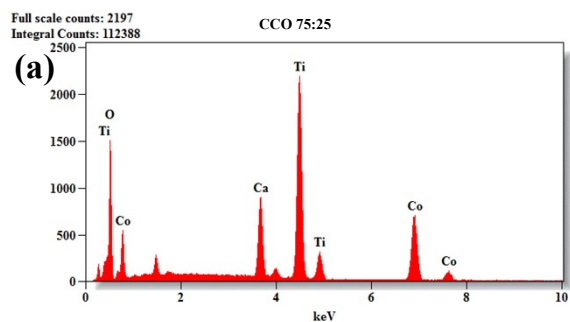

| Sample    | Co [Weight%] | Ti [Weight%] | O [Weight%] | Ca [Weight%] |
|-----------|--------------|--------------|-------------|--------------|
| CCO 75:25 | 24.21        | 30.49        | 37.91       | 7.69         |

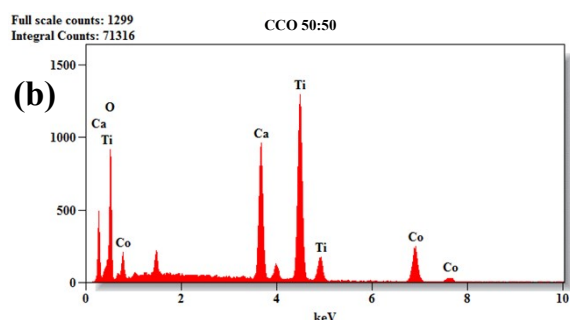

| Sample    | Co [Weight%] | Ti [Weight%] | O [Weight%] | Ca [Weight%] |
|-----------|--------------|--------------|-------------|--------------|
| CCO 50:50 | 13.21        | 30.98        | 42.39       | 13.41        |

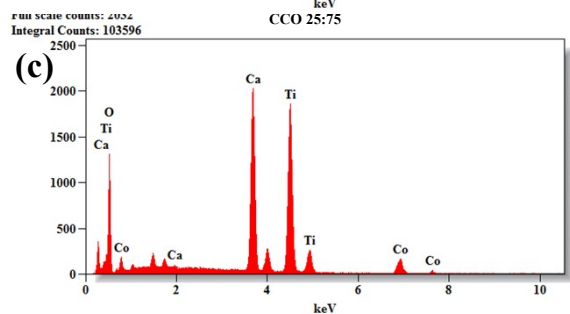

| Sample    | Co [Weight%] | Ti [Weight%] | O [Weight%] | Ca [Weight%] |
|-----------|--------------|--------------|-------------|--------------|
| CCO 25:75 | 6.16         | 29.83        | 44.59       | 19.42        |

**Fig. S1** HRSEM- EDAX spectra of composites CCO 75:25 (a), CCO 50:50 (b), and CCO 75:25 (c).

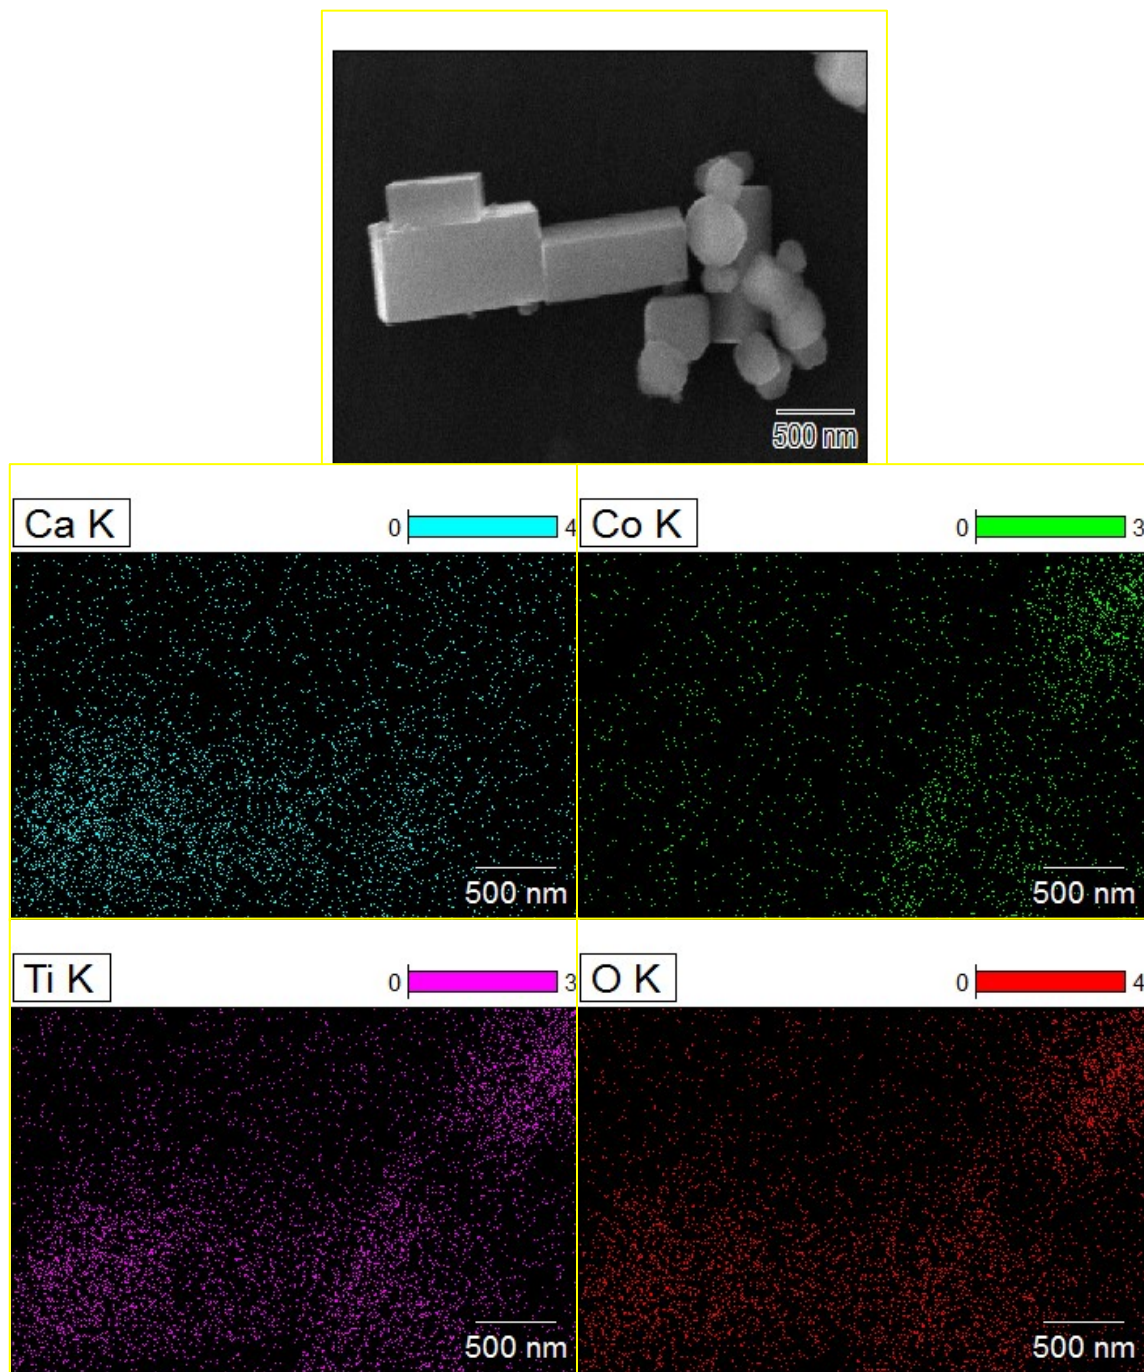

**Fig. S2** Elemental mapping analysis of CCO 75:25 composite.

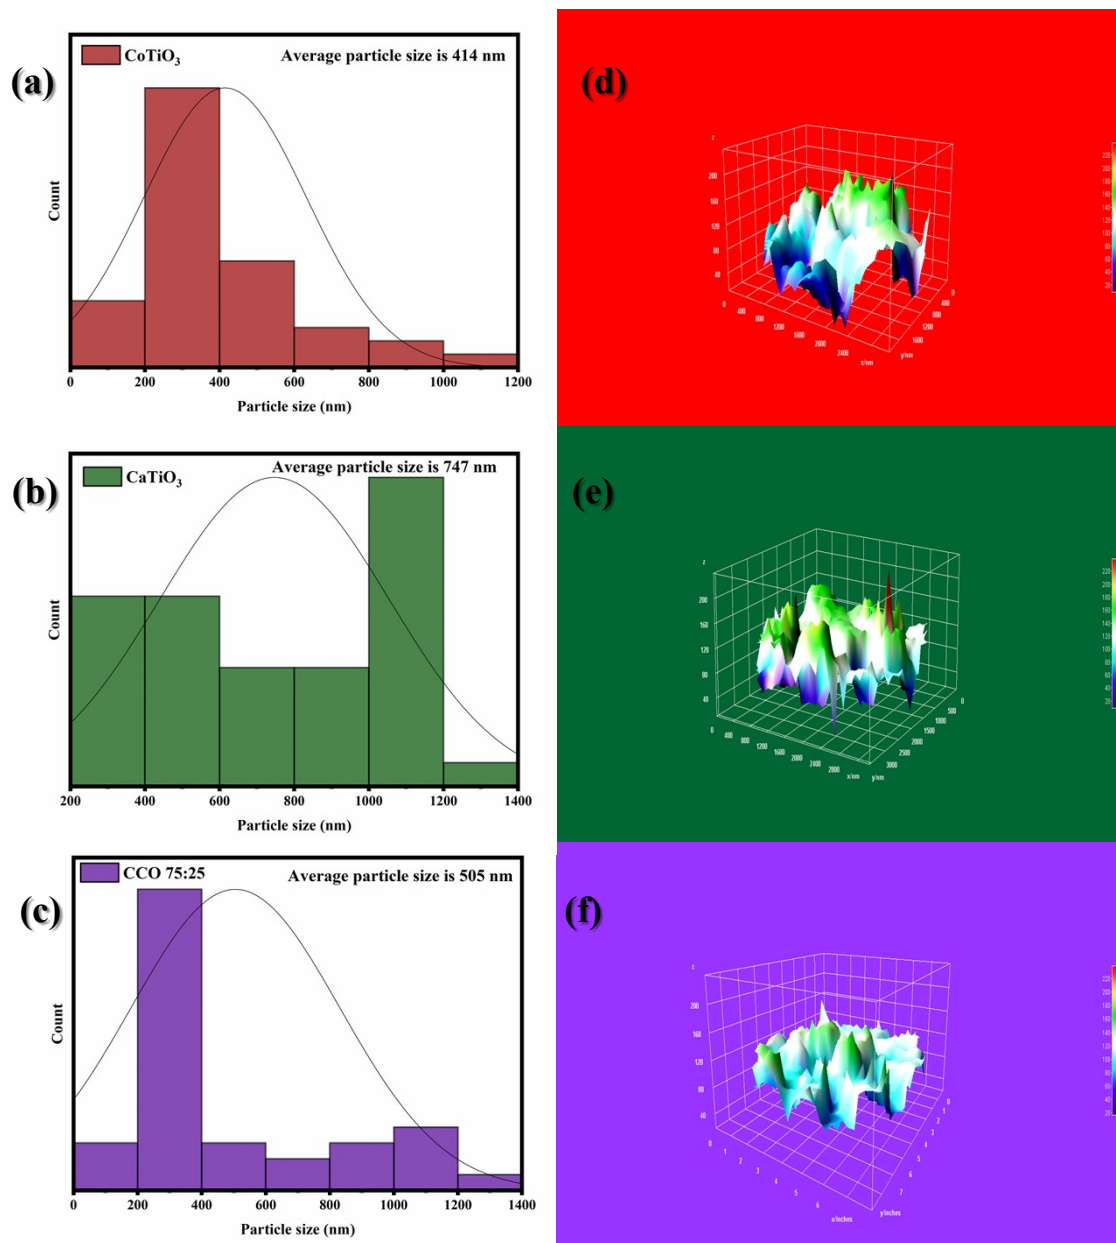

**Fig. S3** Particle size distribution of bare  $\text{CoTiO}_3$  (a),  $\text{CaTiO}_3$  (b), and CCO 75:25 composite (c) and corresponding Surface occupancy plot (SOP) (d), (e), and (f).



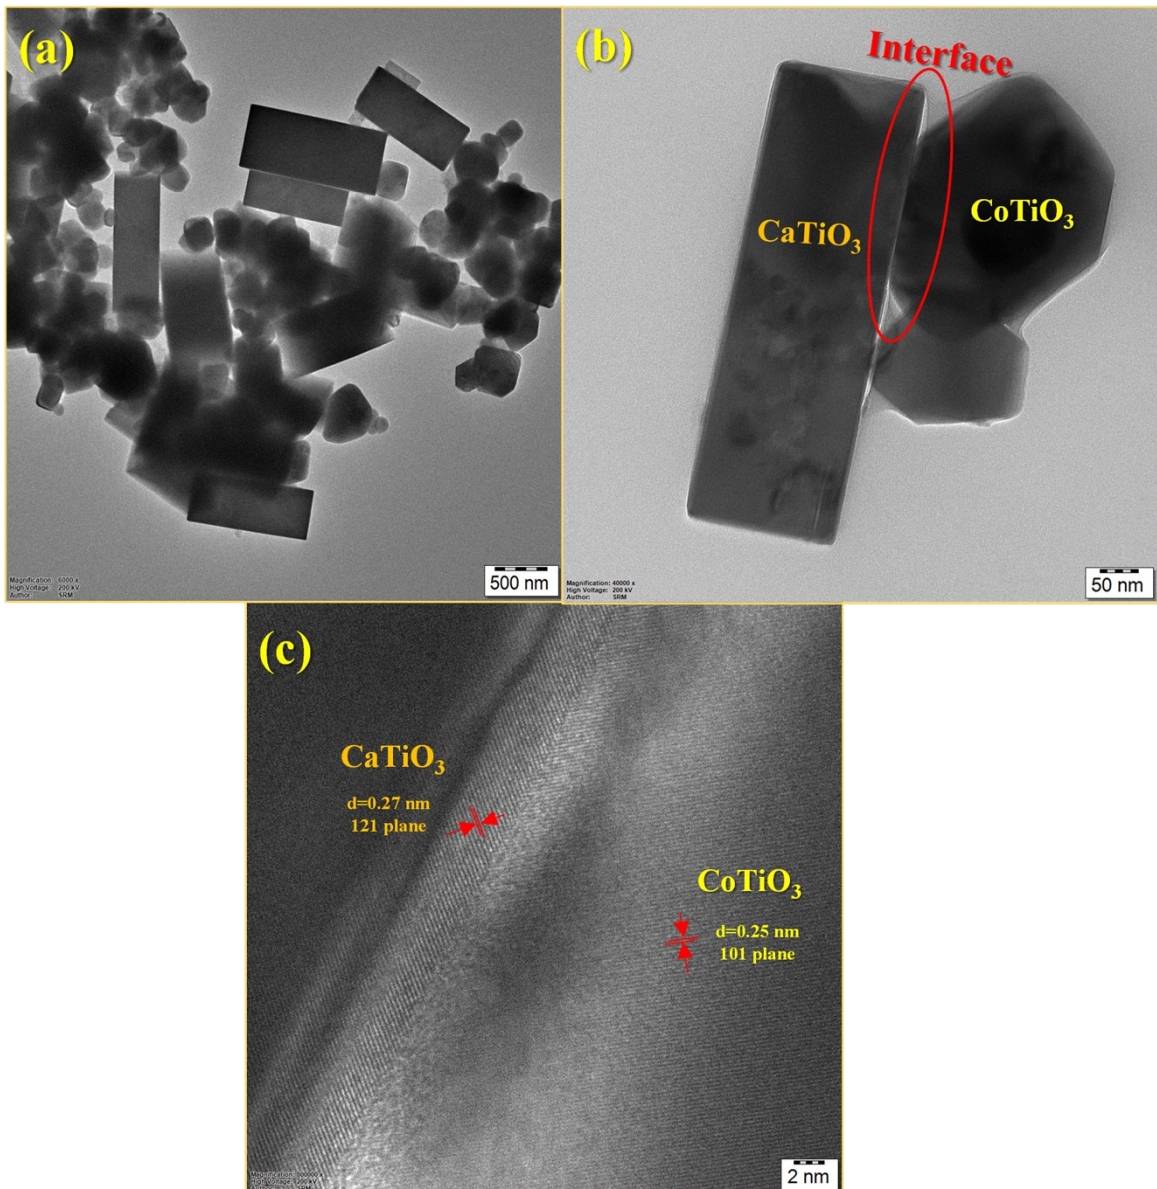

**Fig. S4** HRTEM Image of CCO 75:25's interface.

## 2. Theoretical calculation

The band structure and density of states were calculated using the CP2K package<sup>1</sup> with the exchange-correlation function set as generalized gradient approximation (GGA) parameterized by the Perdew-Burke-Ernzerhof (PBE) (GGA-PBE) functional.<sup>2</sup> The electronic wave function was described using the TZVP-MOLOPT-SR-GTH basis set.<sup>2</sup> Geometry optimization was performed using the BFGS optimization algorithm,<sup>3</sup> with a convergence threshold of 1.0E-6. The Quickstep method<sup>2</sup> was utilized to calculate the total energy and

electronic structure of the systems. Spin-polarized parametrization was taken into account during the calculations. The energy cut-off was set to 400 eV for all samples, and SFC tolerance and k-point were set to be  $2 \times 10^{-6}$  eV atom<sup>-1</sup> and  $1 \times 2 \times 1$ , respectively. The CoTiO<sub>3</sub>/CaTiO<sub>3</sub> model was built by placing the CaTiO<sub>3</sub> model 2.1 Å beneath the CoTiO<sub>3</sub> to form a heterogeneous structure. The ionic cores were set as ultrasoft pseudo-potentials to promote transferability and decrease the number of plane waves required to expand the Kohn-Sham orbitals. A vacuum space of more than 15 Å was introduced to avoid interference between neighboring systems.

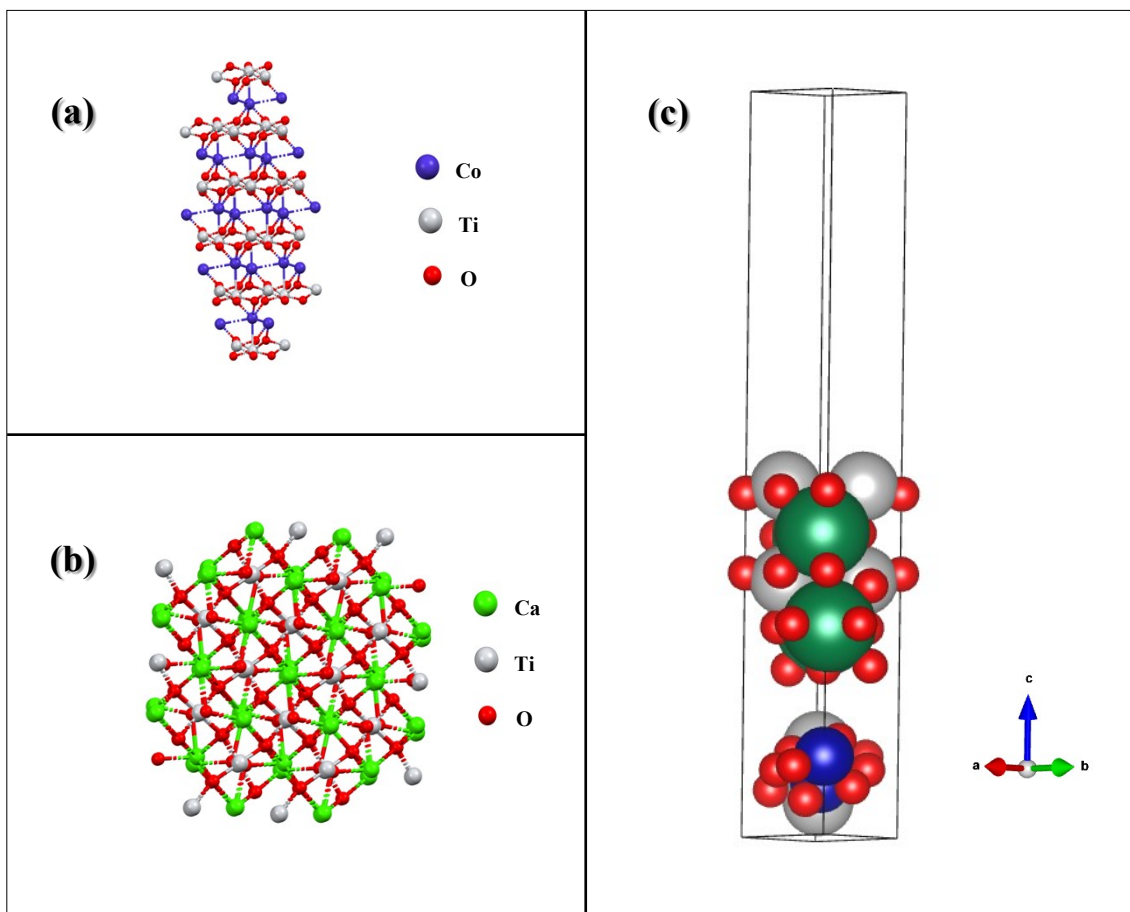

**Fig. S5** Optimized structures of CoTiO<sub>3</sub> (a), CaTiO<sub>3</sub> (b), and CoTiO<sub>3</sub>/CaTiO<sub>3</sub> (c).



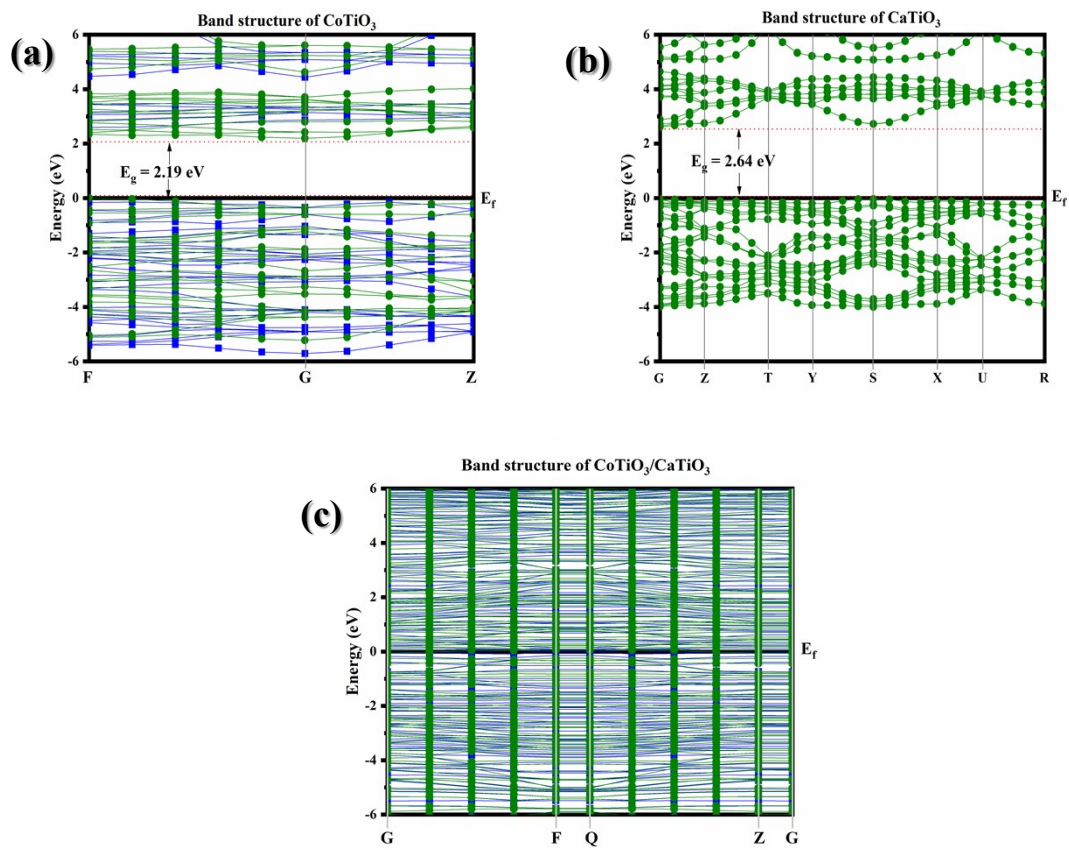

**Fig. S6** The calculated band structure of  $\text{CoTiO}_3$  (a),  $\text{CaTiO}_3$  (b), and  $\text{CoTiO}_3/\text{CaTiO}_3$ .

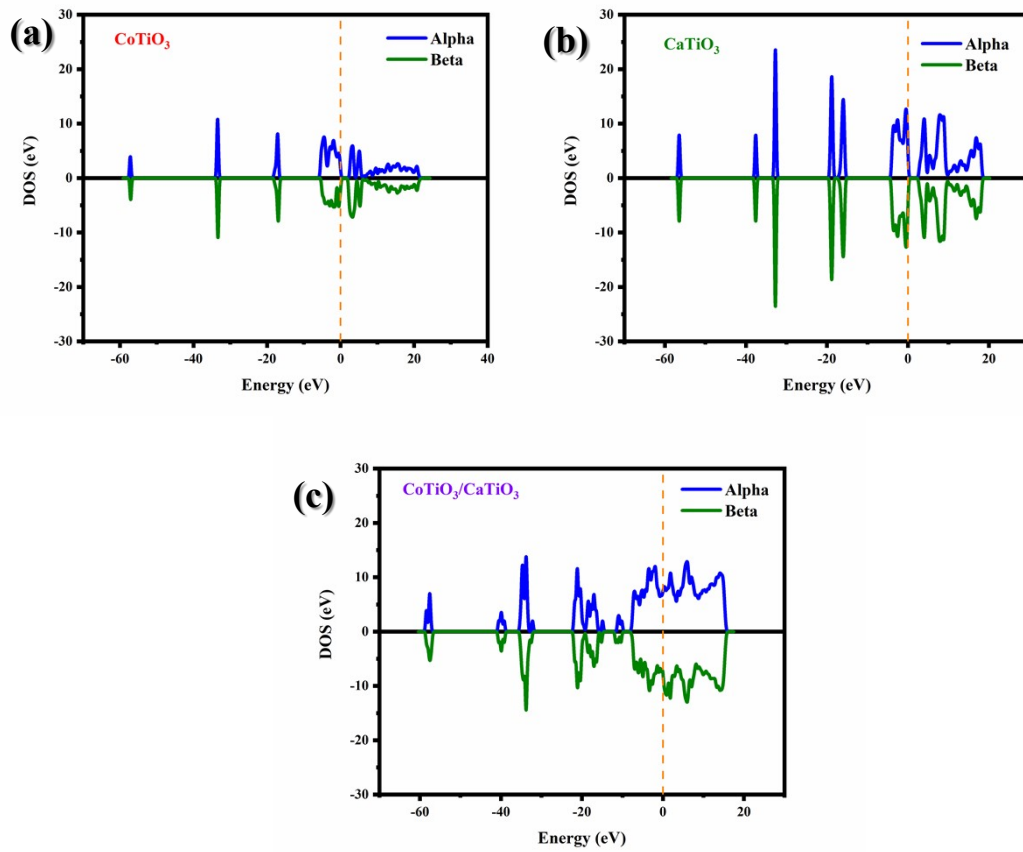

**Fig. S7** Calculated total density of states (TDOS) of  $\text{CoTiO}_3$  (a),  $\text{CaTiO}_3$  (b), and  $\text{CoTiO}_3/\text{CaTiO}_3$ .

### 3. Validation of band edges using the Mott-Schottky analysis

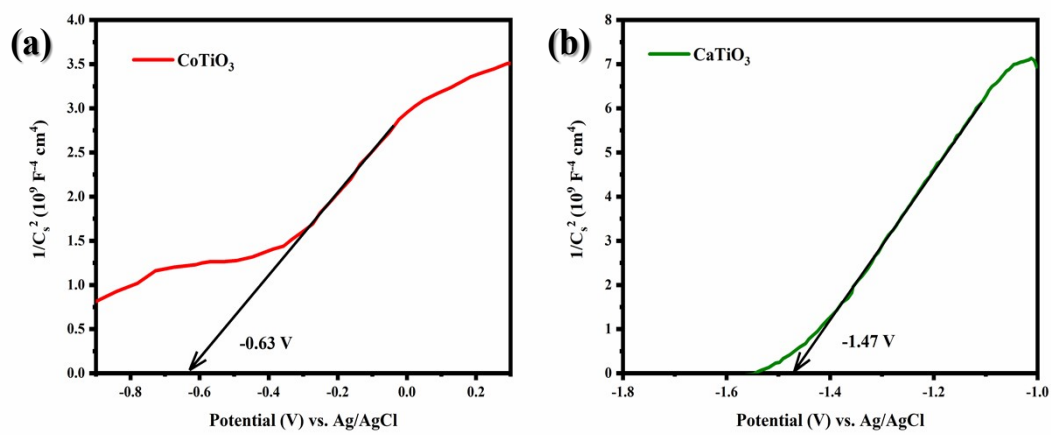

**Fig. S8** Mott-Schottky plots of  $\text{CoTiO}_3$  (a), and  $\text{CaTiO}_3$  (b).

The Mott-Schottky (M-S) plots are used to determine the flat band potential of bare CoTiO<sub>3</sub> and CaTiO<sub>3</sub> (Fig. S7a and b). The calculated flat band potentials of bare CoTiO<sub>3</sub> and CaTiO<sub>3</sub> are -0.63 V and -1.47 V (vs Ag/AgCl) respectively.

$$E_{NHE} = E_{SHE} + 0.0591 \times pH + 0.241 V \quad (1)$$

$$E_{VB} = E_g + E_{CB} \quad (2)$$

Based on the provided values, the conduction band potentials ( $E_{CB}$ ) of bare CoTiO<sub>3</sub> and CaTiO<sub>3</sub> can be calculated in terms of the normal hydrogen electrode (NHE) using equation 1.<sup>4,5</sup> The  $E_{CB}$  values bare CoTiO<sub>3</sub> and CaTiO<sub>3</sub> are -0.024 V and -0.815 V, respectively. Additionally, based on equation 2,<sup>6</sup> the valence band potentials ( $E_{VB}$ ) for bare CoTiO<sub>3</sub> and CaTiO<sub>3</sub> are 2.436 V and 2.665 V, respectively.

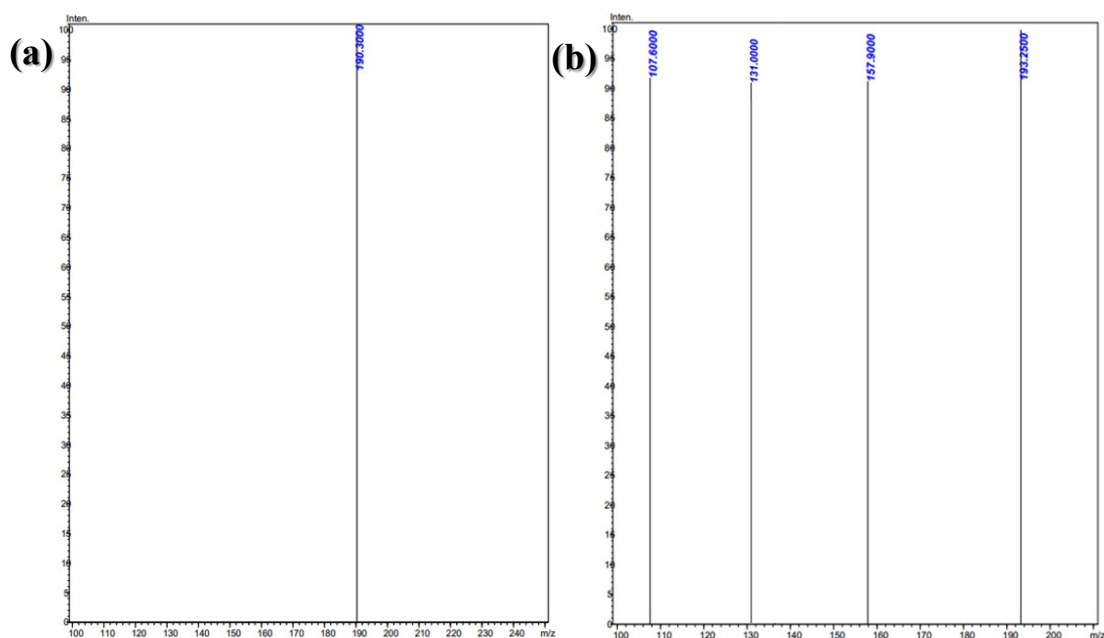

**Fig. S9** LC-MS spectra of CBZ before photocatalysis (a), after photocatalysis using CCO 75:25 composite (b).

## References

- 1 J. P. Perdew, M. Ernzerhof and K. Burke, *J. Chem. Phys.*, 1996, **105**, 9982–9985.
- 2 J. VandeVondele, M. Krack, F. Mohamed, M. Parrinello, T. Chassaing and J. Hutter, *Comput. Phys. Commun.*, 2005, **167**, 103–128.
- 3 F. M. Larkin, *Mathematics of Computation*, 1980, **35**, 803-816.
- 4 L. Wang, Z. Wang, D. Wang, X. Shi, H. Song and X. Gao, *Solid State Sci.*, 2014, **31**, 85–90.
- 5 Y. Luo, B. Deng, Y. Pu, A. Liu, J. Wang, K. Ma, F. Gao, B. Gao, W. Zou and L. Dong, *Appl. Catal. B*, 2019, **247**, 1–9.
- 6 X. Chen, Y. Li, Z. Wu, X. Xu, W. Zhu and X. Gao, *J. Colloid. Interface Sci.*, 2021, **602**, 553–562.
